# Supplementary material for: Novel Variants in MPV17, PRX, GJB1, and SACS Cause Charcot–Marie–Tooth and Spastic Ataxia of Charlevoix–Saguenay Type Diseases
Source: MDPI journal article supplement (doi:10.3390/genes14020328), 2023-01-27
Supplement: s1 [file s1]

**Supplementary Table S1:** The classification of different types of Charcot-Marie-Tooth (CMT) disease includes subtypes, their phenotypes, OMIM ID, mode of inheritance, responsible genes, chromosomal location, protein, UniProtKB ID, and onset age.

| Charcot-Marie-Tooth Disease Type 1 (CMT1) |              |          |             |               |           |                      |         |           |                                          |
|-------------------------------------------|--------------|----------|-------------|---------------|-----------|----------------------|---------|-----------|------------------------------------------|
| S/No.                                     | Subtypes     | CMT OMIM | Inheritance | Gene          | Gene OMIM | Chromosomal location | Protein | UniprotKB | Onset age                                |
| 1.1                                       | CMT type 1A  | 118220   | AD          | <i>PMP22</i>  | 601097    | 17p12                | PMP22   | Q01453    | 1 <sup>st</sup> -2 <sup>nd</sup> decade  |
| 1.2                                       | CMT type 1B  | 118200   | AD          | <i>MPZ</i>    | 159440    | 1q23.3               | MPZ     | P25189    | 1 <sup>st</sup> -2 <sup>nd</sup> decade  |
| 1.3                                       | CMT type 1C  | 601098   | AD          | <i>LITAF</i>  | 603795    | 16p13.13             | LITAF   | Q99732    | 2-12 years                               |
| 1.4                                       | CMT type 1D  | 607678   | AD          | <i>EGR2</i>   | 129010    | 10q21.3              | EGR2    | P11161    | 1 <sup>st</sup> -2 <sup>nd</sup> decade  |
| 1.5                                       | CMT type 1E  | 118300   | AD          | <i>PMP22</i>  | 601097    | 17p12                | PMP22   | Q01453    | 2-12 years                               |
| 1.6                                       | CMT type 1F  | 607734   | AD/AR       | <i>NEFL</i>   | 162280    | 8p21.2               | NEFL    | P07196    | 1-13 years                               |
| 1.7                                       | CMT type 1G  | 6168279  | AD          | <i>PMP2</i>   | 170715    | 8q21.13              | PMP2    | P02689    | 1 <sup>st</sup> -2 <sup>nd</sup> decade  |
| 1.8                                       | CMT type 1H  | 619764   | AD          | <i>FBLN5</i>  | 604580    | 14q32.12             | FBLN5   | Q9UBX5    | 1 <sup>st</sup> - 3 <sup>rd</sup> Decade |
| 1.9                                       | CMT type 1I  | 619742   | AD          | <i>POLR3B</i> | 614366    | 12q23.3              | POLR3B  | Q9NW08    | 1 <sup>st</sup> -2 <sup>nd</sup> decade  |
| Charcot-Marie-Tooth Disease Type 2 (CMT2) |              |          |             |               |           |                      |         |           |                                          |
| 2.1                                       | CMT type 2A1 | 118210   | AD          | <i>KIF1B</i>  | 605995    | 1p36.22              | KIF1B   | O60333    | 1 <sup>st</sup> – 5 <sup>th</sup> decade |
| 2.2                                       | CMT type 2A2 | 609260   | AD/AR       | <i>MFN2</i>   | 608507    | 1p36.22              | MFN2    | O95140    | 1 <sup>st</sup> – 5 <sup>th</sup> decade |
| 2.3                                       | CMT type 2B  | 600882   | AD          | <i>RAB7</i>   | 602298    | 3q21.3               | RAB7    | P51149    | 2 <sup>nd</sup> Decade                   |
| 2.3.1                                     | CMT type 2B1 | 605588   | AR          | <i>LMNA</i>   | 150330    | 1q22                 | LMNA    | P02545    | 1 <sup>st</sup> - 3 <sup>rd</sup> Decade |
| 2.3.2                                     | CMT type 2B2 | 605589   | AR          | <i>MED25</i>  | 605610    | 19q13.33             | MED25   | Q71SY5    | 3 <sup>rd</sup> – 5 <sup>th</sup> decade |

|      |              |        |       |               |        |          |        |        |                                          |
|------|--------------|--------|-------|---------------|--------|----------|--------|--------|------------------------------------------|
| 2.4  | CMT type 2C  | 606071 | AD    | <i>TRPV4</i>  | 605427 | 12q24.11 | TRPV4  | Q9HBA0 | 1 <sup>st</sup> – 6 <sup>th</sup> decade |
| 2.5  | CMT type 2CC | 616924 | AD    | <i>NEFH</i>   | 162230 | 22q12.2  | NEFH   | P12036 | 1 <sup>st</sup> – 4 <sup>th</sup> Decade |
| 2.6  | CMT type 2D  | 601472 | AD    | <i>GARS1</i>  | 600287 | 7p14.3   | GARS1  | P41250 | 2 <sup>nd</sup> – 3 <sup>rd</sup> decade |
| 2.7  | CMT type 2DD | 618036 | AD    | <i>ATP1A1</i> | 182310 | 1p13.1   | ATP1A1 | P05023 | 1 <sup>st</sup> -2 <sup>nd</sup> decade  |
| 2.8  | CMT type 2E  | 607684 | AD    | <i>NEFM</i>   | 162280 | 8p21.2   | NEFM   | P07197 | 1 <sup>st</sup> - 3 <sup>rd</sup> Decade |
| 2.9  | CMT type 2EE | 618400 | AR    | <i>MPV17</i>  | 137960 | 2p23.3   | MPV17  | P39210 | 1 <sup>st</sup> -2 <sup>nd</sup> Decade  |
| 2.10 | CMT type 2F  | 606595 | AD    | <i>HSPB1</i>  | 602195 | 7q11.23  | HSPB1  | P04792 | 2 <sup>nd</sup> – 3 <sup>rd</sup> decade |
| 2.11 | CMT type 2FF | 619519 | AD    | <i>CADM3</i>  | 609743 | 1q23.2   | CADM3  | Q8N126 | 1 <sup>st</sup> - 3 <sup>rd</sup> Decade |
| 2.12 | CMT type 2GG | 606483 | AD    | <i>GBF1</i>   | 603698 | 10q24.32 | GBF1   | Q92538 | 2 <sup>nd</sup> – 3 <sup>rd</sup> decade |
| 2.13 | CMT type 2HH | 619574 | AD    | <i>JAG1</i>   | 601920 | 20p12.2  | JAG1   | P78504 | 1 <sup>st</sup> - 3 <sup>rd</sup> Decade |
| 2.14 | CMT type 2I  | 607677 | AD    | <i>MPZ</i>    | 159440 | 1q23.3   | MPZ    | P25189 | 4 <sup>th</sup> -6 <sup>th</sup> Decade  |
| 2.15 | CMT type 2J  | 607736 | AD    | <i>MPZ</i>    | 159440 | 1q23.3   | MPZ    | P25189 | 4 <sup>th</sup> – 6 <sup>th</sup> decade |
| 2.16 | CMT type 2K  | 607831 | AD/AR | <i>GDAP1</i>  | 606598 | 8q21.11  | GDAP1  | Q8TB36 | < 3 Years                                |
| 2.17 | CMT type 2L  | 608673 | AD    | <i>HSPB8</i>  | 608014 | 12q24.23 | HSPB8  | Q9UJY1 | 2 <sup>nd</sup> – 4 <sup>th</sup> decade |
| 2.18 | CMT type 2M  | 606482 | AD    | <i>DNM2</i>   | 602378 | 19q13.2  | DNM2   | P50570 | 1 <sup>st</sup> - 3 <sup>rd</sup> Decade |
| 2.19 | CMT type 2N  | 613287 | AD    | <i>AARS</i>   | 601065 | 16q22.1  | AARS   | P49588 | 1 <sup>st</sup> – 6 <sup>th</sup> Decade |

|                                                                      |              |        |       |                |        |               |              |        |                                          |
|----------------------------------------------------------------------|--------------|--------|-------|----------------|--------|---------------|--------------|--------|------------------------------------------|
| 2.20                                                                 | CMT type 2O  | 614228 | AD    | <i>DYNC1H1</i> | 600112 | 14q32.31      | DYNC1H1<br>1 | Q14204 | 1 <sup>st</sup> Decade                   |
| 2.21                                                                 | CMT type 2P  | 614436 | AR    | <i>LRSAM1</i>  | 610933 | 9q33.3-q34.11 | LRSAM1       | Q6UWE0 | 1 <sup>st</sup> – 8 <sup>th</sup> decade |
| 2.22                                                                 | CMT type 2Q  | 615025 | AD    | <i>DHTKD1</i>  | 614984 | 10p14         | DHTKD1       | Q96HY7 | 2 <sup>nd</sup> –3 <sup>rd</sup> decade  |
| 2.23                                                                 | CMT type 2R  | 615490 | AR    | <i>TRIM2</i>   | 614141 | 4q3.1         | TRIM2        | Q9C040 | < 1 year                                 |
| 2.24                                                                 | CMT type 2S  | 616155 | AR    | <i>IGHMBP2</i> | 600502 | 11q13.3       | IGHMBP2      | P38935 | 1 <sup>st</sup> Decade                   |
| 2.25                                                                 | CMT type 2T  | 617017 | AD/AR | <i>MME</i>     | 120520 | 3q25.2        | MME          | P08473 | 4 <sup>th</sup> – 6 <sup>th</sup> Decade |
| 2.26                                                                 | CMT type 2U  | 616280 | AD    | <i>MARS</i>    | 156560 | 12q13.3       | MARS         | P56192 | >50 years                                |
| 2.27                                                                 | CMT type 2V  | 616491 | AD    | <i>NAGLU</i>   | 609701 | 17q21.1       | NAGLU        | P54802 | 2 <sup>nd</sup> – 7 <sup>th</sup> Decade |
| 2.28                                                                 | CMT type 2W  | 616625 | AD    | <i>HARS</i>    | 142810 | 5q31.3        | HARS         | P12081 | 1st – 6 <sup>th</sup><br>Decade          |
| 2.29                                                                 | CMT type 2X  | 616668 | AR    | <i>SPG11</i>   | 610844 | 15q21.1       | SPG11        | Q96JI7 | 1 <sup>st</sup> – 4 <sup>th</sup> Decade |
| 2.30                                                                 | CMT type 2Y  | 616687 | AD    | <i>VCP</i>     | 601023 | 9p13.3        | VCP          | P55072 | 1 <sup>st</sup> – 6 <sup>th</sup> Decade |
| 2.31                                                                 | CMT type 2Z  | 616688 | AD    | <i>MORC2</i>   | 616661 | 22q12.2       | MORC2        | Q9Y6X9 | 1 <sup>st</sup> -2 <sup>nd</sup> decade  |
| Charcot-Marie-Tooth Disease Type 3 (CMT3) or Dejerine-sottas disease |              |        |       |                |        |               |              |        |                                          |
| 3                                                                    | CMT Type 3   | 145900 | AD/AR | <i>MPZ</i>     | 601097 | 1q23.3        | MPZ          | P25189 | 1 <sup>st</sup> -2 <sup>nd</sup> decade  |
|                                                                      |              |        | AD/AR | <i>EGR2</i>    | 129010 | 10q21.3       | EGR2         | P11161 | 1 <sup>st</sup> -2 <sup>nd</sup> decade  |
|                                                                      |              |        | AD/AR | <i>PMP22</i>   | 159440 | 17p12         | PMP22        | Q01453 | 1 <sup>st</sup> -2 <sup>nd</sup> decade  |
|                                                                      |              |        | AD/AR | <i>PRX</i>     | 605725 | 19q13.2       | PRX          | Q9BXM0 | 1 <sup>st</sup> -2 <sup>nd</sup> decade  |
| Charcot-Marie-Tooth Disease Type 4 (CMT4)                            |              |        |       |                |        |               |              |        |                                          |
| 4.1                                                                  | CMT type 4A  | 214400 | AR    | <i>GDAP1</i>   | 606598 | 8q21.11       | GDAP1        | Q8TB36 | < 2 years                                |
| 4.2                                                                  | CMT type 4B1 | 601382 | AR    | <i>MTMR2</i>   | 603557 | 11q21         | MTMR2        | Q13614 | < 4 years                                |
| 4.3                                                                  | CMT type 4B2 | 604563 | AR    | <i>SBF2</i>    | 607697 | 11p15.4       | SBF2         | Q86WG5 | 4-13 years                               |

|                                                                   |              |         |       |                 |        |          |        |        |                                          |
|-------------------------------------------------------------------|--------------|---------|-------|-----------------|--------|----------|--------|--------|------------------------------------------|
| 4.4                                                               | CMT type 4B3 | 615284  | AR    | <i>SBF1</i>     | 603560 | 22q13.33 | SBF1   | O95248 | 5-20 years                               |
| 4.5                                                               | CMT type 4C  | 601596  | AR    | <i>SH3TC2</i>   | 608206 | 5q32     | SH3TC2 | Q8TF17 | 1 <sup>st</sup> – 4 <sup>th</sup> Decade |
| 4.6                                                               | CMT type 4D  | 601455  | AR    | <i>NDRG1</i>    | 605262 | 8q24.22  | NDRG1  | Q92597 | 5-25 years                               |
| 4.7                                                               | CMT type 4E  | 605253  | AD/AR | <i>EGR2/MPZ</i> | 129010 | 10q21.3  | EGR2   | P11161 | Congenital                               |
| 4.8                                                               | CMT type 4F  | 614895  | AR    | <i>PRX</i>      | 605725 | 19q13.2  | PRX    | Q9BXM0 | < 1 years                                |
| 4.9                                                               | CMT type 4G  | 6052850 | AR    | <i>HK-1</i>     | 142600 | 10q22.1  | HK-1   | P19367 | 8-16 years                               |
| 4.10                                                              | CMT type 4H  | 609311  | AR    | <i>FGD4</i>     | 611104 | 12p11.21 | FGD4   | Q96M96 | < 2 years                                |
| 4.11                                                              | CMT type 4J  | 611228  | AR    | <i>FIG4</i>     | 609390 | 6p21     | FIG4   | Q92562 | 1 <sup>st</sup> – 6 <sup>th</sup> Decade |
| 4.12                                                              | CMT type 4K  | 616684  | AR    | <i>SURF1</i>    | 185620 | 9p34.2   | SURF1  | Q15526 | 1 <sup>st</sup> decade                   |
| <b>Charcot-Marie-Tooth Disease X-linked Type (CMTX)</b>           |              |         |       |                 |        |          |        |        |                                          |
| 5.1                                                               | CMT X1       | 302800  | XL-D  | <i>GJB1</i>     | 304040 | Xq13.1   | GJB1   | P08034 | 1 <sup>st</sup> -2 <sup>nd</sup> decade  |
| 5.2                                                               | CMT X2       | 302801  | XL-R  | ?               | ?      | Xp22.2   | ?      | ?      | < 1 years                                |
| 5.3                                                               | CMT X3       | 301802  | XL-R  | ?               | ?      | Xq26     | ?      | ?      | 10-14 years                              |
| 5.4                                                               | CMT X4       | 310490  | XL-R  | <i>AIFM1</i>    | 300169 | Xq26.1   | AIFM1  | O95831 | < 4 years                                |
| 5.5                                                               | CMT X5       | 311070  | XL-R  | <i>PRPS1</i>    | 311850 | Xq22.3   | PRPS1  | P60891 | 1 <sup>st</sup> decade                   |
| 5.6                                                               | CMT X6       | 300905  | XL-D  | <i>PDK3</i>     | 300906 | Xp22.11  | PDK3   | Q15120 | 1 <sup>st</sup> decade                   |
| <b>Dominant Intermediate Charcot-Marie-Tooth Disease (DI-CMT)</b> |              |         |       |                 |        |          |        |        |                                          |
| 6.1                                                               | CMT-DI A     | 606483  | AD    | <i>GBF1</i>     | 603698 | 10q24.32 | GBF1   | Q92538 | 2 <sup>nd</sup> Decade                   |
| 6.2                                                               | CMT-DI B     | 606482  | AD    | <i>DNM2</i>     | 602378 | 19q13.2  | DNM2   | P50570 | 1 <sup>st</sup> -2 <sup>nd</sup> decade  |
| 6.3                                                               | CMT-DI C     | 608323  | AD    | <i>YARS</i>     | 603623 | 1p35.1   | YARS   | P54577 | 1 <sup>st</sup> – 6 <sup>th</sup> Decade |
| 6.4                                                               | CMT-DI D     | 607791  | AD    | <i>MPZ</i>      | 601097 | 1q23.3   | MPZ    | P25189 | ---                                      |

|                                                                    |          |        |    |                |        |          |         |        |                                          |
|--------------------------------------------------------------------|----------|--------|----|----------------|--------|----------|---------|--------|------------------------------------------|
| 6.5                                                                | CMT-DI E | 614455 | AD | <i>INF2</i>    | 610982 | 14q32.33 | INF2    | Q27J81 | 1 <sup>st</sup> -3 <sup>rd</sup> decade  |
| 6.6                                                                | CMT-DI F | 615185 | AD | <i>GNB2</i>    | 139390 | 7q22.1   | GNB2    | P63244 | 1 <sup>st</sup> -2 <sup>nd</sup> decade  |
| 6.7                                                                | CMT-DI G | 617882 | AD | <i>NEFL</i>    | 162280 | 8p21.1   | NEFL    | P07196 | 1 <sup>st</sup> -2 <sup>nd</sup> decade  |
| <b>Recessive Intermediate Charcot-Marie-Tooth Disease (RI-CMT)</b> |          |        |    |                |        |          |         |        |                                          |
| 6.8                                                                | CMT-RI A | 608340 | AR | <i>GDAP1</i>   | 606598 | 8q21.11  | GDAP1   | Q8TB36 | 2-4 years                                |
| 6.9                                                                | CMT-RI B | 613641 | AR | <i>KARS</i>    | 601421 | 16q23.1  | KARS    | Q15046 | ---                                      |
| 6.10                                                               | CMT-RI C | 615376 | AR | <i>PLEKHG5</i> | 611101 | 1p36.31  | PLEKHG5 | O94827 | 1 <sup>st</sup> – 5 <sup>th</sup> Decade |
| 6.11                                                               | CMT-RI D | 616039 | AR | <i>COX6A1</i>  | 602072 | 12q24.31 | COX6A1  | P12074 | 4-5 years                                |

**Table S2:** *In-silico* predictions of the identified variants in their respective genes by online prediction tools

|      |                       | <i>MPV17: c.83G&gt;</i> |                       | <i>PRX: c.231C&gt;A</i> |                       | <i>GJB1 c.61G&gt;C</i> |                       | <i>SACS: c.262C&gt;T</i> |                       | <i>SACS: c.4934G&gt;C</i> |                       |
|------|-----------------------|-------------------------|-----------------------|-------------------------|-----------------------|------------------------|-----------------------|--------------------------|-----------------------|---------------------------|-----------------------|
| S/No | Engine                | Score                   | Indicative Prediction | Score                   | Indicative Prediction | Score                  | Indicative Prediction | Score                    | Indicative Prediction | Score                     | Indicative Prediction |
| 1    | <u>BayesDel addAF</u> | 0.4419                  | Damaging              | 0.618                   | Damaging              | 0.7408                 | Damaging              | 0.625                    | Damaging              | 0.5022                    | Damaging              |
| 2    | <u>BayesDel noAF</u>  | 0.3971                  | Damaging              | 0.6499                  | Damaging              | 0.8263                 | Damaging              | 0.66                     | Damaging              | 0.4836                    | Damaging              |
| 3    | MetaLR                | 0.7972                  | Damaging              | n/p, n/a                | n/p, n/a              | 0.9901                 | Damaging              | n/p, n/a                 | n/p, n/a              | 0.8923                    | Damaging              |

|    |                   |        |             |          |             |             |             |          |             |        |             |
|----|-------------------|--------|-------------|----------|-------------|-------------|-------------|----------|-------------|--------|-------------|
| 4  | <u>MetaRNN</u>    | 0.9275 | Damaging    | n/p, n/a | n/p, n/a    | 0.9942      | Damaging    | n/p, n/a | n/p, n/a    | 0.9386 | Damaging    |
| 5  | MetaSVM           | 0.5284 | Damaging    | n/p, n/a | n/p, n/a    | 0.9692      | Damaging    | n/p, n/a | n/p, n/a    | 1.0003 | Damaging    |
| 6  | <u>REVEL</u>      | 0.787  | n/p, n/a    | n/p, n/a | n/p, n/a    | 0.971       | n/p, n/a    | n/p, n/a | n/p, n/a    | 0.8489 | n/p, n/a    |
| 7  | <u>BLOSUM</u>     | 8      | n/p, n/a    | n/p, n/a | n/p, n/a    | 6           | n/p, n/a    | n/p, n/a | n/p, n/a    | -5     | n/p, n/a    |
| 8  | <u>DANN</u>       | 0.9962 | n/p, n/a    | 0.9934   | n/p, n/a    | 0.999       | n/p, n/a    | 0.9971   | n/p, n/a    | 0.9913 | n/p, n/a    |
| 9  | <u>DEOGEN2</u>    | 0.6296 | Damaging    | n/p, n/a | n/p, n/a    | 0.8818      | Damaging    | n/p, n/a | n/p, n/a    | 0.7455 | Damaging    |
| 10 | <u>EIGEN</u>      | 0.3549 | n/p, n/a    | 0.2456   | n/p, n/a    | n/p,<br>n/a | n/p, n/a    | 0.6421   | n/p, n/a    | 0.5472 | n/p, n/a    |
| 11 | <u>EIGEN PC</u>   | 0.3916 | n/p, n/a    | 0.002112 | n/p, n/a    | n/p,<br>n/a | n/p, n/a    | 0.4614   | n/p, n/a    | 0.4478 | n/p, n/a    |
| 12 | <u>FATHMM</u>     | 2.11   | Damaging    | 0.4617   | Neutral     | 6.3         | Damaging    | n/p, n/a | n/p, n/a    | -2.99  | Damaging    |
| 13 | <u>FATHMM-MKL</u> | 0.9467 | Damaging    | 0.1743   | Neutral     | 0.9715      | Damaging    | 0.9542   | Damaging    | 0.9821 | Damaging    |
| 14 | <u>FATHMM-XF</u>  | 0.7566 | Damaging    | n/p, n/a | n/p, n/a    | n/p,<br>n/a | n/p, n/a    | 0.7482   | Damaging    | 0.9591 | Damaging    |
| 15 | <u>LIST-S2</u>    | 0.8637 | Damaging    | n/p, n/a | n/p, n/a    | 0.893       | Damaging    | n/p, n/a | n/p, n/a    | 0.9291 | Damaging    |
| 16 | <u>LRT</u>        | -0.0   | Deleterious | 0        | Deleterious | 0           | Deleterious | 0.000006 | Deleterious | 0      | Deleterious |
| 17 | <u>M-CAP</u>      | 0.5715 | Damaging    | n/p, n/a | n/p, n/a    | 0.9597      | Damaging    | n/p, n/a | n/p, n/a    | 0.8277 | Damaging    |

|    |                              |           |                    |          |                    |        |                    |          |                    |                 |                    |
|----|------------------------------|-----------|--------------------|----------|--------------------|--------|--------------------|----------|--------------------|-----------------|--------------------|
| 18 | <u>Mutation<br/>assessor</u> | 2.48      | Medium             | n/p, n/a | n/p, n/a           | 4.015  | High               | n/p, n/a | n/p, n/a           | 3.355           | Medium             |
| 19 | <u>MutationTaster</u>        | 1, 0.9999 | Disease<br>causing | 1        | Disease<br>causing | 1      | Disease<br>causing | 1        | Disease<br>causing | 0.9993          | Disease<br>causing |
| 20 | <u>MVP</u>                   | 0.9123    | n/p, n/a           | n/p, n/a | n/p, n/a           | 0.9998 | n/p, n/a           | n/p, n/a | n/p, n/a           | 0.9294          | n/p, n/a           |
| 21 | <u>PrimateAI</u>             | 0.7167    | Tolerated          | n/p, n/a | n/p, n/a           | 0.9061 | Damaging           | n/p, n/a | n/p, n/a           | 0.7239          | Tolerated          |
| 22 | <u>PROVEAN</u>               | 4.44      | Damaging           | n/p, n/a | n/p, n/a           | 7.22   | Damaging           | n/p, n/a | n/p, n/a           | -6.28,<br>-6.04 | Damaging           |
| 23 | <u>SIFT</u>                  | -0.045    | Damaging           | n/p, n/a | n/p, n/a           | 0      | Damaging           | n/p, n/a | n/p, n/a           | 0               | Damaging           |
| 24 | <u>SIFT4G</u>                | -0.028    | Damaging           | n/p, n/a | n/p, n/a           | -0.001 | Damaging           | n/p, n/a | n/p, n/a           | 0               | Damaging           |

n/p: not predicted by online in-silico tools, n/a: not available
